# Supplementary material for: Transferrin-Conjugated Melittin-Loaded L-Arginine-Coated Iron Oxide Nanoparticles for Mitigating Beta-Amyloid Pathology of the 5XFAD Mouse Brain
Source: MDPI journal article supplement (doi:10.3390/ijms241914954), 2023-10-06
Supplement: s1 [file s1]

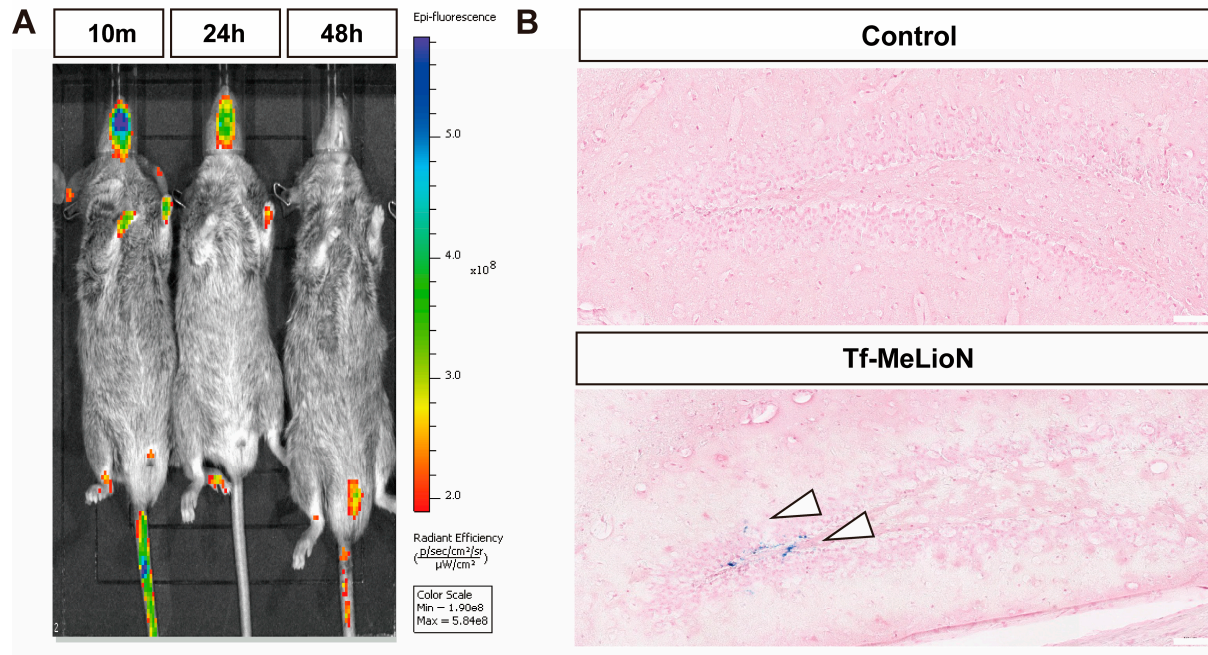

**Supplementary Figure S1.** Brain delivery of Tf-MeLioNs to 5XFAD mice. (A) Whole-mouse imaging was performed at various time-points (10 min, 24 h, and 48 h) using the IVIS® Lumina III system, following intravenous administration of Tf-MeLioNs. (B) Representative images of Prussian Blue staining of 5XFAD mice tissues from the PBS- (control) and Tf-MeLioNs-administered groups. Blue pigments (white arrow) in the DG of hippocampus indicate Tf-MeLioNs. Scale bar: 50  $\mu\text{m}$ . Tf-MeLioNs, transferrin-conjugated melittin-loaded L-arginine-coated iron oxide nanoparticles

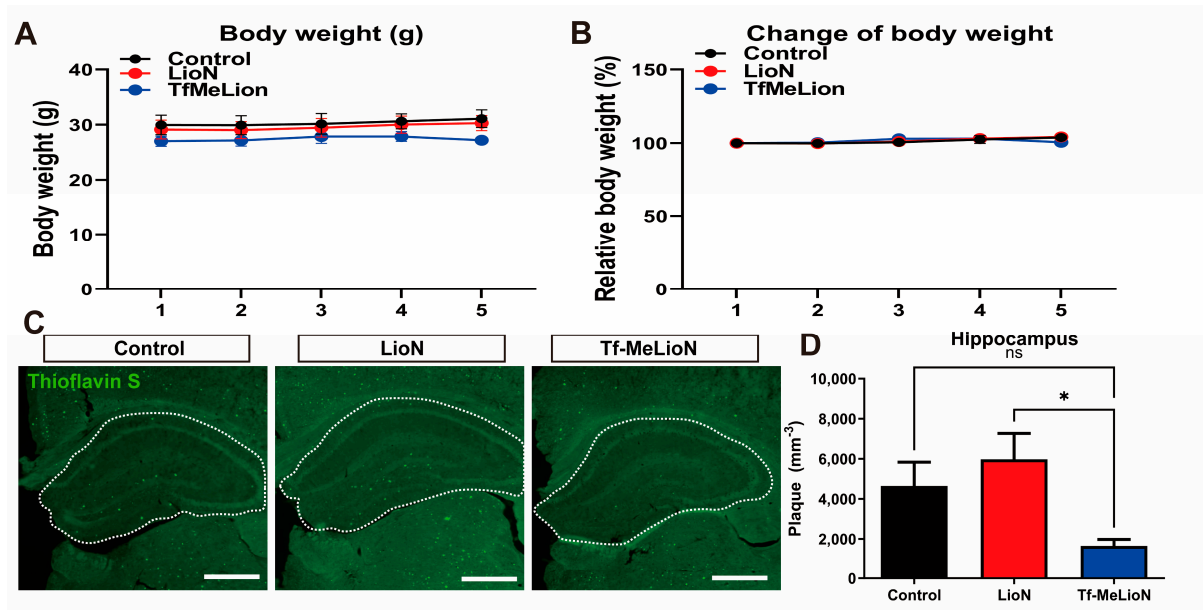

**Supplementary Figure S2.** Effects of Tf-MeLioN treatment on the number of amyloid plaques in the early stage of 5XFAD mice. Relative body weight change was observed and recorded weekly over five weeks (A-B). Representative images of Thioflavin S staining of the hippocampus tissues. Scale bar: 1000  $\mu$ m (C). Quantification of the number of Thioflavin-S-positive plaques in the hippocampus (D). \* $p < 0.05$  (one-way analysis of variance with Tukey's post hoc analysis). Data are presented as mean  $\pm$  standard error of the mean.  $n=4-5$  per group, for analyzing the number of amyloid plaques. LioNs, L-arginine-coated iron oxide nanoparticles; Tf-MeLioNs, transferrin-conjugated melittin-loaded LioNs
